# Supplementary material for: Theoretical insights into the alkaline metal M (M = Na and Cs) promotion mechanism for CO2 activation on the Cu(111) surface
Source: Royal Society of Chemistry journal article supplement (doi:10.1039/c6ra10321a), 2016-01-01
Supplement: c6ra10321a1.pdf [file c6ra10321a1.pdf]

# Supporting information for “Theoretical insights into alkaline metal M (M=Na and Cs) promotion mechanism for CO<sub>2</sub> activation on the Cu (111) surface”

Lihui Ou\*, Yuandao Chen, Junling Jin

## 1. The geometry structures of CO<sub>2</sub> on clean and Na and Cs-promoted Cu(111)

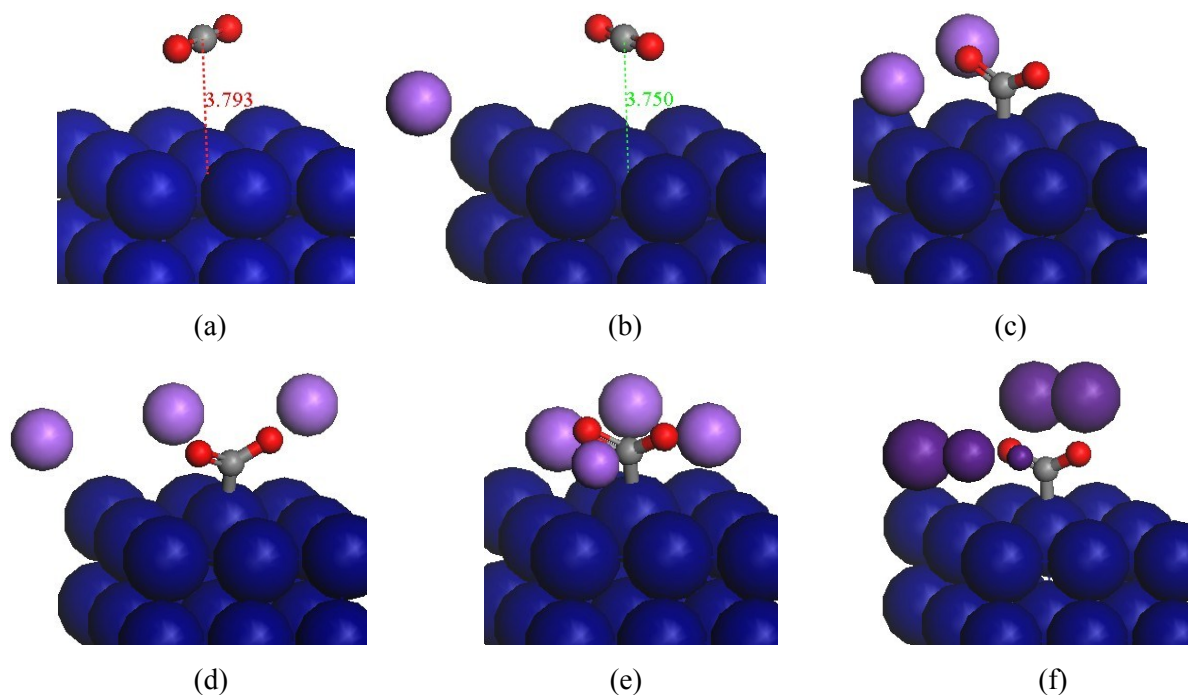

**Fig. S1** The optimized geometry structures of CO<sub>2</sub> on clean and alkaline metals Na-promoted Cu(111) surface: (a) Clean; (b) 1/9 Na; (c) 2/9 Na; (d) 3/9 Na; (e) 4/9 Na; (f) 5/9 Na.

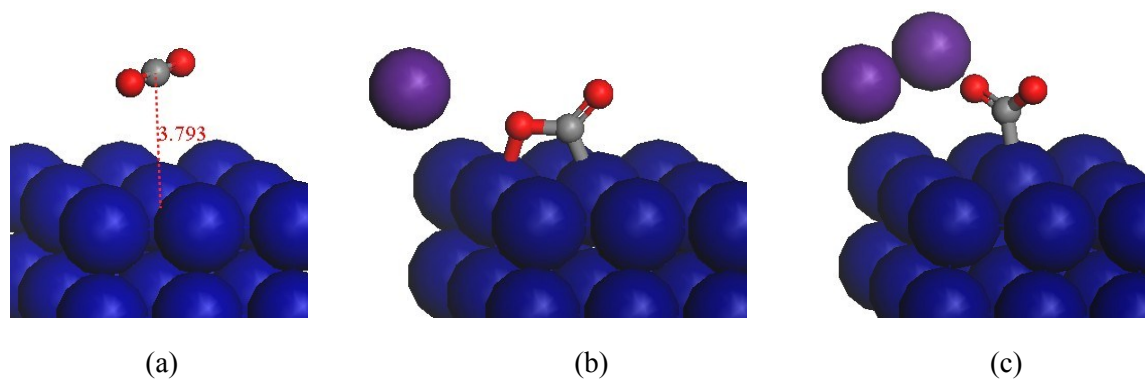

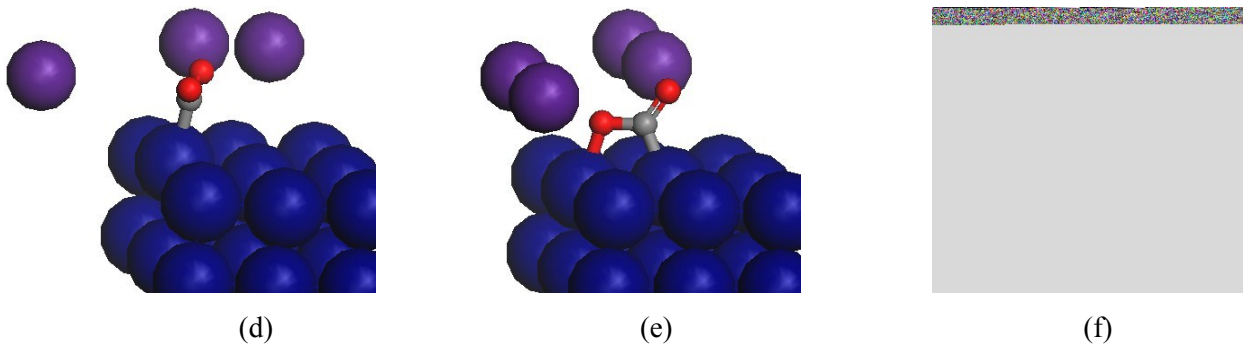

**Fig. S2** The optimized geometry structures of CO<sub>2</sub> on clean and alkaline metals Cs-promoted Cu(111) surface: (a) Clean; (b) 1/9 Cs; (c) 2/9 Cs; (d) 3/9 Cs; (e) 4/9 Cs; (f) 5/9 Cs.

## 2. Computational details on work function

The work function was calculated. By definition, the work function  $W$  is the minimum energy required to extract one electron from the surface to an infinite distance, which can be best calculated in the framework of DFT nowadays.<sup>1, 2</sup> The work function is dependent sensitively on the surface ionic and electronic charge distributions, and any surface atomic relaxation or reconstruction may be able to influence it. Thus, these calculations present a theoretical challenge. Generally, making use of slab configurations to calculate surface properties is the most efficient first-principles method at present. The expression of work function calculation is exactly equivalent to:<sup>3</sup>  $W = V_{\text{vacuum}} - E_F$ , where  $V_{\text{vacuum}}$  is vacuum level, and it is defined to be mean electrostatic potential perpendicular to vacuum layer,  $E_F$  is the Fermi level of system. The PROPROCESSING and AVERAGE codes contained in the Quantum ESPRESSO distribution were used to calculate  $V_{\text{vacuum}}$ . The electrostatic potential is first obtained for the present systems, and then the macroscopic averages of electrostatic potential for various states are evaluated. For example, on clean Cu(111),  $V_{\text{vacuum}}$  is evaluated from the slab by means of the macroscopic average of the total electrostatic potential, if vacuum layer is thick enough, one should find a constant value in the vacuum layer region. This value, we then can refer to vacuum level, and the position of the Fermi level  $E_F$  is also evaluated by Cu slab configurations (see Fig. S3).

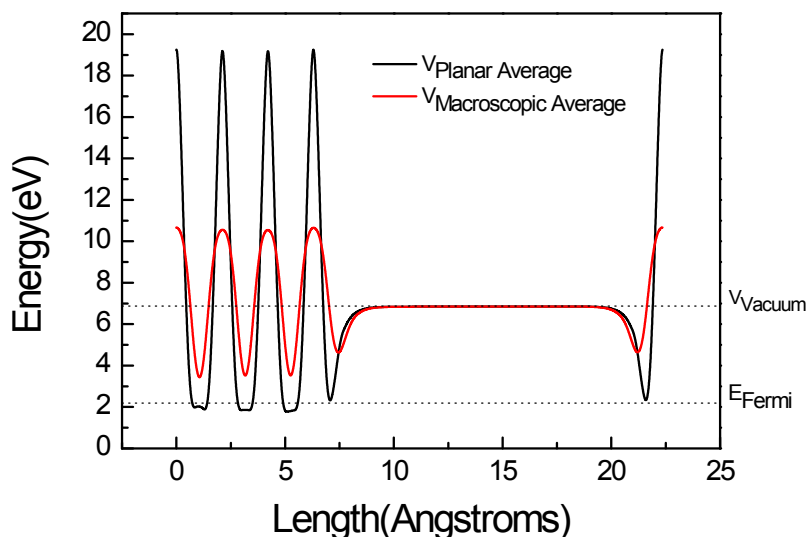

**Fig. S3** Planar averaged total electrostatic potential (black line) and corresponding macroscopic average (red line) for clean Cu(111) surface. The vacuum level  $V_{\text{vacuum}}$  and the slab Fermi level  $E_F$  are indicated.

**Table S1** The calculated vacuum level,  $V_{\text{vacuum}}$  and Fermi level,  $E_{\text{Fermi}}$  for the clean Cu(111) and Na and Cs-promoted Cu(111) in the absence of CO<sub>2</sub> molecule on the Cu (111) surface

| Alkaline Metal | $V_{\text{vacuum}}$ (eV) | $E_{\text{Fermi}}$ | Alkaline Metal | $V_{\text{vacuum}}$ (eV) | $E_{\text{Fermi}}$ |
|----------------|--------------------------|--------------------|----------------|--------------------------|--------------------|
| 0              | 6.87                     | 2.19               | 0              | 6.87                     | 2.19               |
| 1/9 Na         | 7.40                     | 2.92               | 1/9 Cs         | 7.66                     | 3.30               |
| 2/9 Na         | 7.73                     | 3.22               | 2/9 Cs         | 8.00                     | 3.52               |
| 3/9 Na         | 8.00                     | 3.43               | 3/9 Cs         | 8.02                     | 3.59               |
| 4/9 Na         | 8.00                     | 3.51               | 4/9 Cs         | 8.02                     | 3.66               |
| 5/9 Na         | 8.00                     | 3.52               | 5/9 Cs         | 8.12                     | 3.76               |

### 3. Computational details on Löwdin population analysis

The Löwdin population analyses are carried out in the present study. Based on the projected electron densities of states, the Löwdin charge (the number of valence electron) of each surface with different Na and Cs coverage can be obtained from Löwdin population analysis in the absence and presence of CO<sub>2</sub>. Tables S2 and S3 gives the average electron gains ( $\Delta q$ ) for surface Cu, Na and Cs atoms in Na and Cs-promoted Cu(111) in the absence of CO<sub>2</sub>, respectively, Tables S4 and S5 give the average electron gains ( $\Delta q$ ) for CO<sub>2</sub>, surface Cu, Na and Cs atoms in Na and Cs-promoted Cu(111) in the presence of CO<sub>2</sub>, respectively, which were obtained by subtracting the Löwdin charge of the corresponding component of clean Cu(111) surface and isolated Na and Cs atoms from that in the optimized structure. A gain of electron by the component will be implied by a positive value of  $\Delta q$ .

**Table S2** The average electron gains ( $\Delta q$ ) of total,  $s$ ,  $p$ , and  $d$  orbitals of surface Cu and Na atoms in Na-promoted Cu(111) in the absence of CO<sub>2</sub> compared to clean Cu(111) surface and isolated Na atoms

|          |    | Difference of Average Electron/Atom ( $\Delta q$ ) |         |         |         |
|----------|----|----------------------------------------------------|---------|---------|---------|
|          |    | Total                                              | $s$     | $p$     | $d$     |
| Isolated | Cu | 0.0000                                             | 0.0000  | /       | 0.0000  |
|          | Na | 0.0000                                             | 0.0000  | 0.0000  | /       |
| 1/9 Na   | Cu | +0.0314                                            | +0.0289 | /       | +0.0023 |
|          | Na | -0.4414                                            | -0.4413 | -0.0002 | /       |
| 2/9 Na   | Cu | +0.0338                                            | +0.0324 | /       | +0.0013 |
|          | Na | -0.2505                                            | -0.2501 | -0.0005 | /       |
| 3/9 Na   | Cu | +0.0398                                            | +0.0374 | /       | +0.0023 |
|          | Na | -0.1549                                            | -0.1547 | -0.0003 | /       |
| 4/9 Na   | Cu | +0.0489                                            | +0.0479 | /       | +0.0010 |
|          | Na | -0.1210                                            | -0.1205 | -0.0006 | /       |
| 5/9 Na   | Cu | +0.0548                                            | +0.0530 | /       | +0.0016 |
|          | Na | -0.1168                                            | -0.1155 | -0.0013 | /       |

**Table S3** The average electron gains ( $\Delta q$ ) of total,  $s$ ,  $p$ , and  $d$  orbitals of surface Cu and Cs atoms in Cs-promoted Cu(111) in the absence of CO<sub>2</sub> compared to clean Cu(111) surface and isolated Cs atoms

|          |    | Difference of Average Electron/Atom ( $\Delta q$ ) |         |         |         |
|----------|----|----------------------------------------------------|---------|---------|---------|
|          |    | Total                                              | $s$     | $p$     | $d$     |
| Isolated | Cu | 0.0000                                             | 0.0000  | /       | 0.0000  |
|          | Cs | 0.0000                                             | 0.0000  | 0.0000  | 0.0000  |
| 1/9 Cs   | Cu | -0.0389                                            | -0.0280 | /       | -0.0110 |
|          | Cs | +0.4192                                            | -0.0065 | +0.0709 | +0.4129 |
| 2/9 Cs   | Cu | -0.1215                                            | -0.0951 | /       | -0.0265 |
|          | Cs | +0.6265                                            | +0.0036 | +0.0509 | +0.5719 |
| 3/9 Cs   | Cu | -0.1731                                            | -0.1431 | /       | -0.0301 |
|          | Cs | +0.6399                                            | -0.0884 | +0.0013 | +0.7270 |
| 4/9 Cs   | Cu | -0.1444                                            | -0.1167 | /       | -0.0278 |
|          | Cs | +0.4179                                            | -0.2569 | -0.1248 | +0.7995 |
| 5/9 Cs   | Cu | -0.1617                                            | -0.1324 | /       | -0.0294 |
|          | Cs | +0.3521                                            | -0.2948 | -0.1309 | +0.7778 |

**Table S4** The average electron gains ( $\Delta q$ ) of total,  $s$ ,  $p$ , and  $d$  orbitals of CO<sub>2</sub>, surface Cu and Na atoms in Na-promoted Cu(111) in the presence of CO<sub>2</sub> compared to clean Cu(111) surface and isolated CO<sub>2</sub> and Na atoms

|          |    | Difference of Average Electron/Atom ( $\Delta q$ ) |         |         |         |
|----------|----|----------------------------------------------------|---------|---------|---------|
|          |    | Total                                              | $s$     | $p$     | $d$     |
| Isolated | Cu | 0.0000                                             | 0.0000  | /       | 0.0000  |
|          | Na | 0.0000                                             | 0.0000  | 0.0000  | /       |
|          | C  | 0.0000                                             | 0.0000  | 0.0000  | /       |
|          | O  | 0.0000                                             | 0.0000  | 0.0000  | /       |
|          | O  | 0.0000                                             | 0.0000  | 0.0000  | /       |
| 0 Na     | Cu | +0.0008                                            | +0.0007 | /       | 0.0000  |
|          | C  | +0.0101                                            | +0.0028 | +0.0072 | /       |
|          | O  | +0.0011                                            | 0.0000  | +0.0011 | /       |
|          | O  | +0.0011                                            | -0.0001 | +0.0011 | /       |
| 1/9 Na   | Cu | +0.0351                                            | +0.0328 | /       | +0.0020 |
|          | Na | -0.4806                                            | -0.4804 | -0.0003 | /       |
|          | C  | -0.0145                                            | +0.0014 | -0.0159 | /       |
|          | O  | +0.0428                                            | -0.0172 | +0.0601 | /       |
|          | O  | -0.0306                                            | -0.0046 | -0.0206 | /       |
| 2/9 Na   | Cu | +0.0067                                            | +0.0177 | /       | -0.0112 |
|          | Na | -0.5535                                            | -0.5531 | -0.0005 | /       |
|          | C  | +0.4842                                            | +0.2960 | +0.1882 | /       |
|          | O  | +0.1754                                            | +0.0317 | +0.1437 | /       |
|          | O  | +0.3508                                            | +0.0387 | +0.3121 | /       |
| 3/9 Na   | Cu | +0.0140                                            | +0.0249 | /       | -0.0110 |
|          | Na | -0.4882                                            | -0.4876 | -0.0007 | /       |
|          | C  | +0.6151                                            | +0.3807 | +0.2344 | /       |
|          | O  | +0.3280                                            | +0.0420 | +0.2860 | /       |
|          | O  | +0.3454                                            | +0.0485 | +0.2969 | /       |
| 4/9 Na   | Cu | +0.0171                                            | +0.0262 | /       | -0.0091 |
|          | Na | -0.3843                                            | -0.3832 | -0.0012 | /       |
|          | C  | +0.6771                                            | +0.4065 | +0.2706 | /       |
|          | O  | +0.3924                                            | +0.0500 | +0.3424 | /       |
|          | O  | +0.3235                                            | +0.0426 | +0.2809 | /       |
| 5/9 Na   | Cu | +0.0248                                            | +0.0337 | /       | -0.0090 |
|          | Na | -0.3435                                            | -0.3427 | -0.0009 | /       |
|          | C  | +0.6832                                            | +0.4427 | +0.2404 | /       |
|          | O  | +0.3917                                            | +0.0544 | +0.3372 | /       |
|          | O  | +0.3934                                            | +0.0547 | +0.3387 | /       |

**Table S5** The average electron gains ( $\Delta q$ ) of total,  $s$ ,  $p$ , and  $d$  orbitals of CO<sub>2</sub>, surface Cu and Cs atoms in Cs-promoted Cu(111) in the presence of CO<sub>2</sub> compared to clean Cu(111) surface and isolated CO<sub>2</sub> and Cs atoms

|          |    | Difference of Average Electron/Atom ( $\Delta q$ ) |         |         |         |
|----------|----|----------------------------------------------------|---------|---------|---------|
|          |    | Total                                              | $s$     | $p$     | $d$     |
| Isolated | Cu | 0.0000                                             | 0.0000  | /       | 0.0000  |
|          | Cs | 0.0000                                             | 0.0000  | 0.0000  | 0.0000  |
|          | C  | 0.0000                                             | 0.0000  | 0.0000  | /       |
|          | O  | 0.0000                                             | 0.0000  | 0.0000  | /       |
|          | O  | 0.0000                                             | 0.0000  | 0.0000  | /       |
| 0 Cs     | Cu | +0.0008                                            | +0.0007 | /       | 0.0000  |
|          | C  | +0.0101                                            | +0.0028 | +0.0072 | /       |
|          | O  | +0.0011                                            | 0.0000  | +0.0011 | /       |
|          | O  | +0.0011                                            | -0.0001 | +0.0011 | /       |
| 1/9 Cs   | Cu | -0.0706                                            | -0.0477 | /       | -0.0230 |
|          | Cs | +0.1488                                            | -0.2459 | +0.0371 | +0.3577 |
|          | C  | +0.4625                                            | +0.2575 | +0.2050 | /       |
|          | O  | +0.0584                                            | -0.0162 | +0.0745 | /       |
|          | O  | +0.1895                                            | +0.0180 | +0.1714 | /       |
| 2/9 Cs   | Cu | -0.1117                                            | -0.0861 | /       | -0.0257 |
|          | Cs | +0.3313                                            | -0.1973 | +0.0510 | +0.4775 |
|          | C  | +0.4623                                            | +0.2591 | +0.2032 | /       |
|          | O  | +0.1056                                            | -0.0320 | +0.1377 | /       |
|          | O  | +0.1041                                            | -0.0323 | +0.1364 | /       |
| 3/9 Cs   | Cu | -0.1756                                            | -0.1393 | /       | -0.0364 |
|          | Cs | +0.4354                                            | -0.2093 | +0.0111 | +0.6336 |
|          | C  | +0.4798                                            | +0.2764 | +0.2034 | /       |
|          | O  | +0.1005                                            | -0.0294 | +0.1300 | /       |
|          | O  | +0.0950                                            | -0.0360 | +0.1310 | /       |
| 4/9 Cs   | Cu | -0.1570                                            | -0.1202 | /       | -0.0370 |
|          | Cs | +0.1640                                            | -0.3371 | -0.0101 | +0.6024 |
|          | C  | +0.4755                                            | +0.2545 | +0.2210 | /       |
|          | O  | +0.0173                                            | -0.0493 | +0.0666 | /       |
|          | O  | +0.1464                                            | -0.0047 | +0.1511 | /       |
| 5/9 Cs   | Cu | -0.1573                                            | -0.1219 | /       | -0.0355 |
|          | Cs | +0.2225                                            | -0.3502 | -0.1287 | +0.7014 |
|          | C  | +0.4064                                            | +0.1949 | +0.2115 | /       |
|          | O  | +0.0303                                            | -0.0432 | +0.0734 | /       |
|          | O  | +0.0319                                            | -0.0435 | +0.0754 | /       |

## References

- 1 M. Methfessel, D. Hennig and M. Scheffler, *Phys. Rev. B*, 1992, **46**, 4816–4829.
- 2 H. L. Skriver and N. M. Rosengaard, *Phys. Rev. B*, 1992, **46**, 7157–7168.
- 3 N. D. Lang and W. Kohn, *Phys. Rev. B*, 1971, **3**, 1215–1222.
